# Supplementary material
Source: MDPI journal article supplement (https://www.mdpi.com/2072-4292/9/11/1112)
Supplement: s1 [file s1]

**Table S1.** Confusion Matrix and Change Detection Quantitative Evaluation (%) on the First Dataset.

| Method        |           | Result             |           | Accuracy (%)                           |
|---------------|-----------|--------------------|-----------|----------------------------------------|
|               |           | (number of pixels) |           |                                        |
|               |           | change             | unchanged |                                        |
| CD_PCA_Kmeans | change    | 23,261             | 3,311     | FA = 4.34,<br>MA = 12.46,<br>OE = 4.76 |
|               | unchanged | 21,571             | 475,133   |                                        |
| CD_MLS        | change    | 22,707             | 3,865     | FA = 7.6,<br>MA = 14.55,<br>OE = 7.95  |
|               | unchanged | 37,733             | 458,971   |                                        |
| Semi_FCM      | change    | 24,130             | 2,442     | FA = 8.71,<br>MA = 9.19,<br>OE = 8.73  |
|               | unchanged | 43,248             | 453,456   |                                        |
| The proposed  | change    | 24,703             | 1,869     | FA = 3.29,<br>MA = 7.03,<br>OE = 3.48  |
|               | unchanged | 16,318             | 480,386   |                                        |

**Table S2.** Confusion Matrix and Change Detection Quantitative Evaluation (%) on the Second Dataset.

| Method        |           | Result             |           | Accuracy (%)                           |
|---------------|-----------|--------------------|-----------|----------------------------------------|
|               |           | (number of pixels) |           |                                        |
|               |           | change             | unchanged |                                        |
| CD_PCA_Kmeans | change    | 28,240             | 6,826     | FA = 2.52,<br>MA = 19.47,<br>OE = 3.35 |
|               | unchanged | 17,059             | 660,375   |                                        |
| CD_MLS        | change    | 27,771             | 7,295     | FA = 7.48,<br>MA = 20.8,<br>OE = 8.13  |
|               | unchanged | 50,641             | 626,793   |                                        |
| Semi_FCM      | change    | 29,750             | 5,316     | FA = 8.53,<br>MA = 15.16,<br>OE = 8.86 |
|               | unchanged | 57,788             | 619,646   |                                        |
| The proposed  | change    | 28,797             | 6,269     | FA = 1.87,<br>MA = 17.9,<br>OE = 2.66  |
|               | unchanged | 12,676             | 664,758   |                                        |

**Table.3.** Confusion Matrix and Change Detection Quantitative Evaluation (%) on the Mexico Dataset

| Method        |           | Result             |           | Accuracy (%)                          |
|---------------|-----------|--------------------|-----------|---------------------------------------|
|               |           | (number of pixels) |           |                                       |
|               |           | change             | unchanged |                                       |
| CD_PCA_Kmeans | change    | 22,965             | 2,624     | FA = 0.78,<br>MA = 10.3,<br>OE = 1.71 |
|               | unchanged | 1,847              | 234,708   |                                       |
| CD_MLS        | change    | 22,554             | 3,035     | FA = 0.58,<br>MA = 11.9,<br>OE = 1.68 |
|               | unchanged | 1,367              | 235,188   |                                       |
| Semi_FCM      | change    | 21,757             | 3,832     | FA = 0.41,<br>MA = 15.0,<br>OE = 1.83 |
|               | unchanged | 968                | 235,587   |                                       |
| The proposed  | change    | 24,379             | 1,210     | FA = 1.08,<br>MA = 4.73,<br>OE = 1.43 |
|               | unchanged | 2,547              | 234,008   |                                       |

**Table S4.** Confusion Matrix and Change Detection Quantitative Evaluation (%) on the Sardinia Island dataset

| Method        |           | Result             |           | Accuracy (%)                          |
|---------------|-----------|--------------------|-----------|---------------------------------------|
|               |           | (number of pixels) |           |                                       |
|               |           | change             | unchanged |                                       |
| CD_PCA_Kmeans | change    | 6490               | 1136      | FA = 1.26,<br>MA = 14.9,<br>OE = 2.1  |
|               | unchanged | 1461               | 114513    |                                       |
| CD_MLS        | change    | 6876               | 750       | FA = 2.64,<br>MA = 9.83,<br>OE = 3.09 |
|               | unchanged | 3065               | 112909    |                                       |
| Semi_FCM      | change    | 6874               | 752       | FA = 1.77,<br>MA = 9.86,<br>OE = 2.27 |
|               | unchanged | 2048               | 113926    |                                       |
| The proposed  | change    | 7021               | 605       | FA = 1.48,<br>MA = 7.93,<br>OE = 1.88 |
|               | unchanged | 1722               | 114252    |                                       |
